# Supplementary material for: Transglutaminase 2 Prevents Premature Senescence and Promotes Osteoblastic Differentiation of Mesenchymal Stem Cells through NRF2 Activation
Source: Hindawi journal article supplement (doi:10.1155/2023/8815888), 2023-10-20
Supplement: f1 [file 8815888.f1.pdf]

**Supplementary Table S1. RT-qPCR primer sequences**

| <b>Gene name</b> | <b>Forward (5' to 3')</b> | <b>Reverse (3' to 5')</b> |
|------------------|---------------------------|---------------------------|
| SPP1             | TTCGCAGACCTGACATCCAGTACC  | TCCTCGCTTTCCATGTGTGAGG    |
| SPARC            | TGGCGAGTTTGAGAAGGTGTGC    | TGTGGCAAAGAAGTGGCAGGAAG   |
| ALP              | ATCCAGATCCTGCGGAAGAACC    | GTGGTCAATTCTGCCTCCTTCC    |
| RUNX2            | CACCTTGACCATAACCGTCTTCAC  | CATCAAGCTTCTGTCTGTGCCTTC  |
| PPARG            | AGCCTCATGAAGAGCCTTCCAAC   | TCTCCGGAAGAAACCCTTGCATC   |
| CEBPA            | AGCATTGCCTAGGAACACGAAGC   | TTGTCATAACTCCGGTCCCTCTGG  |
| FABP4            | GCAGATGACAGGAAAGTCAAGAGC  | TCTGCACATGTACCAGGACACC    |
| CFD              | AGGGTCACCCAAGCAACAAAGTC   | ACCAACCAGATGCAGGAGTGGATG  |
| HMOX1            | TCAGGCAGAGGGTGATAGAAGAGG  | TGCAACTCCTCAAAGAGCTGGATG  |
| NQO1             | TGCTGCAGCGGCTTTGAAGAAG    | GCAGGGTCCTTCAGTTTACCTGTG  |

**Supplementary Table S2. Genes positively correlated with TG2 expression ( $r > 0.3$ )**

| <b>Gene</b> | <b>Pearson correlation</b> | <b>P-value</b> |
|-------------|----------------------------|----------------|
| CAPRIN2     | 0.666726234                | 4.4654E-09     |
| GATA6       | 0.666478788                | 4.54588E-09    |
| ITGA2       | 0.662797743                | 5.91774E-09    |
| KRT19       | 0.639249909                | 2.94344E-08    |
| SPOCK1      | 0.638154774                | 3.16095E-08    |
| LIF         | 0.622647502                | 8.42311E-08    |
| FAM8A1      | 0.615862492                | 1.27203E-07    |
| MLLT11      | 0.614909739                | 1.34679E-07    |
| MEST        | 0.612430828                | 1.56115E-07    |
| RHBDF1      | 0.602147691                | 2.84279E-07    |
| SLC20A1     | 0.602057285                | 2.85755E-07    |
| ZMAT3       | 0.597402637                | 3.72221E-07    |
| KRT18       | 0.592147345                | 4.99185E-07    |
| NR2F2       | 0.583851965                | 7.85088E-07    |
| STX1A       | 0.579241929                | 1.00432E-06    |
| LTBP3       | 0.577417929                | 1.10595E-06    |
| TIMP1       | 0.565742251                | 2.02224E-06    |
| BICD1       | 0.561463876                | 2.50833E-06    |
| LRRC17      | 0.556940021                | 3.13975E-06    |
| ITGBL1      | 0.556523714                | 3.20477E-06    |
| SOX9        | 0.556440703                | 3.21788E-06    |
| CD200       | 0.554818077                | 3.48451E-06    |
| MAP3K14     | 0.553375051                | 3.73882E-06    |
| MICAL2      | 0.548731414                | 4.67969E-06    |
| DNMBP       | 0.546998203                | 5.08428E-06    |
| RGS4        | 0.545059723                | 5.57532E-06    |
| MGP         | 0.540231587                | 6.99714E-06    |
| ST3GAL5     | 0.535956956                | 8.53097E-06    |
| ZNF365      | 0.534748455                | 9.01824E-06    |
| ASAP2       | 0.528101409                | 1.21944E-05    |
| SERPINE2    | 0.519101045                | 1.81655E-05    |
| ARHGAP29    | 0.513774503                | 2.28766E-05    |
| PKD2        | 0.51374763                 | 2.2903E-05     |
| TIMP3       | 0.513469761                | 2.31777E-05    |
| EBF2        | 0.512306914                | 2.43607E-05    |
| GULP1       | 0.509396726                | 2.7571E-05     |
| ETV5        | 0.506636484                | 3.09737E-05    |
| HMGA1       | 0.505899723                | 3.19455E-05    |
| DGKI        | 0.503855718                | 3.47913E-05    |
| CLDN14      | 0.503714958                | 3.49956E-05    |
| IDS         | 0.501393668                | 3.85299E-05    |
| LOC728392   | 0.501337539                | 3.86193E-05    |
| TAX1BP1     | 0.493185469                | 5.38451E-05    |
| WWC3        | 0.492944487                | 5.43698E-05    |
| DUSP6       | 0.492328086                | 5.57334E-05    |
| TNFRSF10B   | 0.490969043                | 5.88521E-05    |
| HGF         | 0.488247264                | 6.55873E-05    |
| PTPRK       | 0.486380316                | 7.06105E-05    |

|          |             |             |
|----------|-------------|-------------|
| HSPB8    | 0.485872815 | 7.2036E-05  |
| LAMB1    | 0.484585549 | 7.57714E-05 |
| APBB2    | 0.483054857 | 8.04451E-05 |
| KDELR3   | 0.482099612 | 8.34948E-05 |
| ATP13A3  | 0.480040472 | 9.04339E-05 |
| ANKH     | 0.478419041 | 9.62671E-05 |
| KCNN4    | 0.477262425 | 0.000100637 |
| WWTR1    | 0.476399039 | 0.000104018 |
| GLIPR1   | 0.475790285 | 0.000106464 |
| MOGS     | 0.475070473 | 0.000109424 |
| DCBLD2   | 0.473597056 | 0.000115721 |
| SLC14A1  | 0.472388889 | 0.00012113  |
| TFPI     | 0.471973733 | 0.000123042 |
| HOXB5    | 0.468779249 | 0.000138706 |
| EVC      | 0.468247398 | 0.000141485 |
| PTX3     | 0.467230639 | 0.00014694  |
| CASK     | 0.467128738 | 0.000147498 |
| ALPL     | 0.463569574 | 0.00016822  |
| ZFC3H1   | 0.461932225 | 0.000178621 |
| C1orf54  | 0.461657591 | 0.000180422 |
| DEPTOR   | 0.461543433 | 0.000181176 |
| PLK3     | 0.460602825 | 0.000187495 |
| TNFAIP3  | 0.458511319 | 0.000202277 |
| F2RL1    | 0.457855167 | 0.00020713  |
| OSBPL10  | 0.457498631 | 0.000209811 |
| LAMC1    | 0.456615635 | 0.000216589 |
| HMGA2    | 0.452981099 | 0.000246647 |
| SMURF2   | 0.452502439 | 0.000250878 |
| SLC17A5  | 0.451730549 | 0.00025784  |
| SVIL     | 0.45103589  | 0.000264256 |
| MAP3K13  | 0.448814665 | 0.000285762 |
| EFNA5    | 0.446626622 | 0.000308498 |
| PRKCA    | 0.44560066  | 0.000319716 |
| FAM171A1 | 0.44547652  | 0.000321099 |
| ADD3     | 0.442751341 | 0.000352851 |
| HSPB6    | 0.440015144 | 0.000387585 |
| CFH      | 0.439912095 | 0.000388952 |
| CD63     | 0.437099832 | 0.000427993 |
| CCND1    | 0.436286979 | 0.000439923 |
| CCL2     | 0.435981958 | 0.000444478 |
| IGFBP3   | 0.433161798 | 0.000488661 |
| MAN1B1   | 0.43199599  | 0.000508064 |
| DNAJC4   | 0.429339309 | 0.000554918 |
| ELL3     | 0.429244366 | 0.000556663 |
| PDLIM3   | 0.428784039 | 0.000565193 |
| SEMA3C   | 0.428389346 | 0.000572601 |
| ZNF692   | 0.427928516 | 0.000581362 |
| CNKSR2   | 0.427831547 | 0.000583221 |
| TSPYL2   | 0.426455204 | 0.000610193 |
| MTMR1    | 0.425901454 | 0.00062136  |

|           |             |             |
|-----------|-------------|-------------|
| ROR1      | 0.423806473 | 0.000665304 |
| F2R       | 0.423524278 | 0.000671434 |
| PLK2      | 0.422745238 | 0.000688622 |
| IFT20     | 0.421648781 | 0.000713488 |
| NES       | 0.420617383 | 0.000737618 |
| ZNF665    | 0.420226571 | 0.000746952 |
| LINC01711 | 0.419053626 | 0.000775612 |
| ZNF337    | 0.418997919 | 0.000776998 |
| EGR3      | 0.416971655 | 0.000828943 |
| PTHLH     | 0.416905602 | 0.000830688 |
| ASB1      | 0.416904377 | 0.00083072  |
| PLAT      | 0.416400183 | 0.00084415  |
| IFNGR2    | 0.415773775 | 0.000861108 |
| DKK1      | 0.415585023 | 0.000866278 |
| JADE1     | 0.415222272 | 0.000876292 |
| CDKN1A    | 0.413123039 | 0.000936326 |
| CORO2B    | 0.412236742 | 0.000962768 |
| AHI1      | 0.410601355 | 0.001013334 |
| ROBO3     | 0.409751132 | 0.001040557 |
| AHR       | 0.408355938 | 0.001086661 |
| TRIM45    | 0.407404693 | 0.001119142 |
| LARS      | 0.407282083 | 0.001123391 |
| MBNL2     | 0.406049277 | 0.001166934 |
| GALNT3    | 0.405870019 | 0.00117339  |
| SHB       | 0.405796841 | 0.001176035 |
| TPCN1     | 0.405534531 | 0.00118556  |
| CES2      | 0.403472125 | 0.001262901 |
| AFAP1     | 0.403465302 | 0.001263165 |
| CHPF2     | 0.403141649 | 0.001275708 |
| SLC46A3   | 0.402829987 | 0.001287892 |
| SKIL      | 0.402537821 | 0.001299408 |
| CDH6      | 0.401564228 | 0.001338458 |
| SCN3A     | 0.400419832 | 0.001385703 |
| UGGT2     | 0.400283025 | 0.00139145  |
| TNFRSF10D | 0.400213964 | 0.00139436  |
| PXDC1     | 0.400041587 | 0.001401645 |
| CAMK2N1   | 0.399896035 | 0.001407824 |
| STARD13   | 0.399575098 | 0.001421533 |
| PHLDA1    | 0.399410874 | 0.001428595 |
| ZNF175    | 0.398939489 | 0.001449039 |
| LIMK2     | 0.397906304 | 0.001494771 |
| CFHR2     | 0.397791945 | 0.001499911 |
| ITFG2     | 0.397453037 | 0.001515239 |
| PRKCI     | 0.396090605 | 0.001578286 |
| CCNL2     | 0.395948711 | 0.001584985 |
| NT5DC3    | 0.39588479  | 0.001588012 |
| ENTPD4    | 0.395781129 | 0.001592931 |
| KRT23     | 0.394168518 | 0.001671232 |
| TIAM1     | 0.393453016 | 0.001707065 |
| DHX32     | 0.393042185 | 0.00172795  |

|           |             |             |
|-----------|-------------|-------------|
| SYNJ2     | 0.392207949 | 0.001771064 |
| GFPT2     | 0.391951673 | 0.0017845   |
| GDF15     | 0.391425012 | 0.0018124   |
| MICALL2   | 0.39047275  | 0.001863839 |
| COL13A1   | 0.390104222 | 0.001884094 |
| FCER2     | 0.389888958 | 0.001896017 |
| SLC7A6    | 0.389443343 | 0.001920911 |
| HTR1F     | 0.387711603 | 0.002020457 |
| CDKN2A    | 0.38760149  | 0.002026939 |
| PRSS3     | 0.38710325  | 0.002056506 |
| DUSP2     | 0.386407081 | 0.002098463 |
| TSPAN2    | 0.386369512 | 0.002100749 |
| TNFRSF25  | 0.386171428 | 0.002112838 |
| PIK3IP1   | 0.38581526  | 0.002134731 |
| KHDC4     | 0.385608493 | 0.002147533 |
| BPGM      | 0.385427658 | 0.002158786 |
| ANXA10    | 0.385395251 | 0.002160808 |
| STC1      | 0.383738399 | 0.002266475 |
| DUSP3     | 0.38333006  | 0.002293216 |
| TRIM66    | 0.383124508 | 0.002306783 |
| GPR1      | 0.381354843 | 0.002426579 |
| SERTAD2   | 0.381191555 | 0.002437908 |
| HMBOX1    | 0.380911088 | 0.002457476 |
| ZNF529    | 0.379945986 | 0.002525884 |
| MZF1      | 0.379055479 | 0.002590505 |
| C9orf16   | 0.378574877 | 0.002625989 |
| CREB3L2   | 0.378305039 | 0.002646101 |
| EDN1      | 0.377669246 | 0.002694032 |
| MDM2      | 0.377547783 | 0.002703276 |
| FRMD4A    | 0.377163399 | 0.002732716 |
| DNAJB4    | 0.376746007 | 0.002765008 |
| TNFRSF12A | 0.37670505  | 0.002768195 |
| MECOM     | 0.376343557 | 0.002796465 |
| PAK3      | 0.376130692 | 0.002813232 |
| ATP6V0A1  | 0.3753395   | 0.002876337 |
| PERP      | 0.37491486  | 0.002910724 |
| SLC22A1   | 0.374837117 | 0.002917058 |
| SH3BGRL3  | 0.374120558 | 0.002976026 |
| PLOD2     | 0.373446741 | 0.003032441 |
| TSPAN13   | 0.373269636 | 0.003047425 |
| ACVR1B    | 0.373264097 | 0.003047895 |
| CDK5R1    | 0.373231245 | 0.003050682 |
| CLUHP3    | 0.373090444 | 0.003062653 |
| TRH       | 0.372380352 | 0.003123666 |
| MIER2     | 0.371435621 | 0.003206511 |
| MAPK13    | 0.368770678 | 0.003450813 |
| BMP4      | 0.368201413 | 0.003505089 |
| MMP24OS   | 0.367865795 | 0.003537441 |
| TMEM159   | 0.367453292 | 0.003577568 |
| LOC155060 | 0.366848125 | 0.003637165 |

|           |             |             |
|-----------|-------------|-------------|
| ATP6V0C   | 0.366685665 | 0.003653314 |
| C14orf132 | 0.36653737  | 0.00366811  |
| COX7A1    | 0.366505107 | 0.003671335 |
| DDB1      | 0.36585674  | 0.003736701 |
| SGK1      | 0.365545548 | 0.003768438 |
| CYP3A4    | 0.365289122 | 0.003794769 |
| CDH2      | 0.365282102 | 0.003795492 |
| G6PD      | 0.363829167 | 0.00394781  |
| XPNPEP1   | 0.362760606 | 0.004063258 |
| MAP3K7CL  | 0.362497085 | 0.004092184 |
| VAMP1     | 0.362353237 | 0.00410805  |
| RNFT2     | 0.360250786 | 0.004346236 |
| PXN       | 0.360084882 | 0.00436554  |
| LOXL2     | 0.359828827 | 0.004395483 |
| PLAGL1    | 0.359536007 | 0.004429947 |
| FAM155A   | 0.359251442 | 0.004463668 |
| AKR1B10   | 0.359241046 | 0.004464904 |
| OTUD3     | 0.359220546 | 0.004467342 |
| FAM131A   | 0.357817831 | 0.004637019 |
| PRAF2     | 0.35763302  | 0.004659792 |
| ADAMTS1   | 0.3567033   | 0.004775863 |
| GABBR1    | 0.356563365 | 0.004793551 |
| TERF2IP   | 0.355286223 | 0.004957681 |
| NPDC1     | 0.35515556  | 0.004974749 |
| COPZ1     | 0.354433905 | 0.00506995  |
| FNDC4     | 0.354274312 | 0.005091219 |
| SLC16A4   | 0.354269246 | 0.005091896 |
| SLC5A3    | 0.354259967 | 0.005093135 |
| SCN8A     | 0.354214224 | 0.005099248 |
| TNFRSF21  | 0.35407636  | 0.00511771  |
| LOX       | 0.353997506 | 0.005128296 |
| FGFR1     | 0.35347234  | 0.005199292 |
| GLRX      | 0.353084752 | 0.005252243 |
| CROCCP3   | 0.352586818 | 0.005320966 |
| ADGRB2    | 0.352569584 | 0.005323358 |
| RPS28     | 0.352087798 | 0.00539063  |
| PTPRO     | 0.351376093 | 0.005491374 |
| NRXN3     | 0.350892303 | 0.005560798 |
| PLA1A     | 0.350652373 | 0.005595513 |
| TSPAN5    | 0.349638815 | 0.005744273 |
| ZNF155    | 0.34945343  | 0.005771855 |
| ATP2C1    | 0.34944693  | 0.005772824 |
| EFEMP1    | 0.349041381 | 0.005833577 |
| NISCH     | 0.348613147 | 0.005898337 |
| ANK3      | 0.348391662 | 0.005932078 |
| PSAP      | 0.348122773 | 0.005973268 |
| TMEM158   | 0.347868293 | 0.006012482 |
| HOXD1     | 0.347654155 | 0.006045655 |
| GLT8D1    | 0.347637777 | 0.006048199 |
| GADD45A   | 0.347414088 | 0.006083035 |

|           |             |             |
|-----------|-------------|-------------|
| ERVH-4    | 0.347391232 | 0.006086604 |
| MAP3K3    | 0.345965518 | 0.00631292  |
| PXDN      | 0.345818385 | 0.006336691 |
| GRB14     | 0.345809104 | 0.006338193 |
| REEP2     | 0.345536244 | 0.006382492 |
| FICD      | 0.345094506 | 0.006454785 |
| TNFSF4    | 0.344428535 | 0.006565131 |
| PRSS3P2   | 0.343844237 | 0.006663302 |
| PHLDA2    | 0.342831329 | 0.006836535 |
| FAR2      | 0.342786641 | 0.006844268 |
| NRCAM     | 0.342763214 | 0.006848325 |
| CCL7      | 0.342191225 | 0.006948031 |
| PLAG1     | 0.34213863  | 0.006957262 |
| RNASEH2B  | 0.341001248 | 0.007159539 |
| SEC14L2   | 0.340891576 | 0.007179313 |
| CREB3     | 0.339280749 | 0.007475293 |
| CDIPT     | 0.339239823 | 0.00748295  |
| SEC14L1P1 | 0.338480482 | 0.007626261 |
| ATP6V1A   | 0.338449706 | 0.00763212  |
| TIPARP    | 0.338356493 | 0.007649888 |
| PAWR      | 0.338099599 | 0.007699044 |
| TRIM62    | 0.337901078 | 0.007737219 |
| CDRT1     | 0.337891717 | 0.007739023 |
| RBPMS     | 0.33774286  | 0.007767762 |
| SHMT1     | 0.337563104 | 0.007802591 |
| SLC25A38  | 0.337240119 | 0.007865514 |
| BHMT2     | 0.337181072 | 0.007877065 |
| LDOC1     | 0.337125524 | 0.007887945 |
| MEG3      | 0.336809681 | 0.007950058 |
| HEPH      | 0.336470538 | 0.008017228 |
| VASH1     | 0.336290179 | 0.008053151 |
| ANKRD1    | 0.335733754 | 0.008164862 |
| UFM1      | 0.334831423 | 0.008348892 |
| CSAD      | 0.334786736 | 0.008358099 |
| DGCR11    | 0.333889038 | 0.00854494  |
| TFPI2     | 0.333794036 | 0.008564925 |
| GNAT3     | 0.333170882 | 0.008697022 |
| OR2C1     | 0.332779261 | 0.008780942 |
| PLXDC2    | 0.332274912 | 0.008890057 |
| MET       | 0.331588508 | 0.009040454 |
| ZNF83     | 0.331506713 | 0.009058523 |
| IER3      | 0.330949769 | 0.009182391 |
| GLS       | 0.33065648  | 0.00924821  |
| PRNP      | 0.33054297  | 0.009273793 |
| PTGIS     | 0.329437427 | 0.009526201 |
| USP20     | 0.3293318   | 0.009550627 |
| ETV1      | 0.329099743 | 0.009604479 |
| NUDT3     | 0.329045656 | 0.009617068 |
| CARD10    | 0.328908541 | 0.009649048 |
| ATP5F1E   | 0.328410574 | 0.009765968 |

|              |             |             |
|--------------|-------------|-------------|
| PKIA         | 0.328310115 | 0.009789704 |
| ZFHX2        | 0.328276371 | 0.009797688 |
| ANOS1        | 0.32806658  | 0.009847452 |
| SEMA4F       | 0.327822001 | 0.009905746 |
| VWA7         | 0.327445137 | 0.009996155 |
| PLXNA3       | 0.327093463 | 0.010081166 |
| LOC100288570 | 0.326913531 | 0.010124904 |
| PLXNA2       | 0.326555426 | 0.010212441 |
| AGAP2        | 0.325490532 | 0.010476639 |
| POFUT2       | 0.325477661 | 0.010479868 |
| TMEM35A      | 0.325099544 | 0.010575119 |
| ADAMTS6      | 0.324879037 | 0.010631011 |
| CYP1A2       | 0.324815279 | 0.01064722  |
| RBPJ         | 0.324577723 | 0.0107078   |
| SFTPB        | 0.324103023 | 0.01082975  |
| GSDMB        | 0.324087304 | 0.010833809 |
| EEF2         | 0.323995146 | 0.010857631 |
| NCOA3        | 0.323205677 | 0.011063566 |
| MAP2         | 0.323171256 | 0.011072622 |
| C16orf70     | 0.322989492 | 0.011120545 |
| GFOD2        | 0.322942161 | 0.011133054 |
| CAPN3        | 0.322700162 | 0.01111972  |
| SLC9A1       | 0.322625584 | 0.011217032 |
| ZSCAN31      | 0.322529343 | 0.01124267  |
| CPA4         | 0.322061192 | 0.011368108 |
| PRSS12       | 0.322040075 | 0.011373795 |
| RGS17        | 0.32155388  | 0.011505404 |
| DDB2         | 0.321455662 | 0.01153215  |
| DYNC1LI2     | 0.321220117 | 0.011596511 |
| BDNF         | 0.320952316 | 0.011670063 |
| LIPG         | 0.320723347 | 0.011733269 |
| LINC00260    | 0.320580952 | 0.011772725 |
| CRLF1        | 0.319921963 | 0.011956823 |
| ALDH1A3      | 0.319828031 | 0.011983265 |
| ABCA1        | 0.319535532 | 0.01206593  |
| RAPGEFL1     | 0.319513972 | 0.012072042 |
| PCDH9        | 0.319376203 | 0.012111165 |
| ABCA8        | 0.319284341 | 0.012137312 |
| PBXIP1       | 0.319136221 | 0.012179575 |
| MCFD2        | 0.318980075 | 0.012224266 |
| OSBP         | 0.318953438 | 0.012231904 |
| THBS2        | 0.318439247 | 0.012380152 |
| SOX5         | 0.318429049 | 0.012383108 |
| MIA2         | 0.317998551 | 0.012508442 |
| PRDM14       | 0.317724164 | 0.012588896 |
| FGF2         | 0.316849293 | 0.012848407 |
| ADAP2        | 0.31678814  | 0.012866718 |
| RGS2         | 0.31652637  | 0.012945354 |
| MAB21L2      | 0.316521959 | 0.012946682 |
| MOXD1        | 0.31634358  | 0.013000509 |



|          |             |             |
|----------|-------------|-------------|
| HYMAI    | 0.315622991 | 0.013219917 |
| LRRC40   | 0.314729866 | 0.01349628  |
| SYT1     | 0.314499919 | 0.013568234 |
| ZNF444   | 0.314465008 | 0.013579187 |
| ZNF767P  | 0.31429054  | 0.013634038 |
| FST      | 0.314015831 | 0.013720791 |
| CLIC4    | 0.313686131 | 0.013825536 |
| SDC4     | 0.31368392  | 0.013826241 |
| MYH10    | 0.313551669 | 0.013868452 |
| VEGFC    | 0.31342146  | 0.013910119 |
| ABCC1    | 0.31295401  | 0.014060593 |
| GDAP2    | 0.312181516 | 0.014312329 |
| PPAT     | 0.311942679 | 0.01439094  |
| GFI1     | 0.311879584 | 0.014411769 |
| UBAP1    | 0.311611093 | 0.014500693 |
| IL12A    | 0.311367978 | 0.014581618 |
| SUSD5    | 0.31133814  | 0.014591577 |
| TEX2     | 0.311271406 | 0.014613872 |
| PACS1    | 0.311199222 | 0.01463802  |
| EVI5     | 0.311198517 | 0.014638256 |
| MMP19    | 0.310926654 | 0.014729513 |
| TRAF1    | 0.31089987  | 0.01473853  |
| INTS6    | 0.30994252  | 0.015063957 |
| TAGLN3   | 0.309922437 | 0.01507085  |
| NAT9     | 0.309304498 | 0.015284245 |
| EBLN2    | 0.309165355 | 0.015332651 |
| LIME1    | 0.309116213 | 0.015349779 |
| MAST4    | 0.309107027 | 0.015352982 |
| SNCAIP   | 0.308762934 | 0.015473339 |
| FNDC3B   | 0.308719341 | 0.015488702 |
| NPAS2    | 0.308301087 | 0.015636276 |
| ZNF224   | 0.308027745 | 0.01573337  |
| AMT      | 0.308012561 | 0.015738779 |
| ZNF701   | 0.307962319 | 0.015756686 |
| RGS20    | 0.307894899 | 0.015780744 |
| NEK9     | 0.307544191 | 0.015906399 |
| PLA2G15  | 0.307529939 | 0.015911523 |
| ITGB1    | 0.30707818  | 0.01607469  |
| HAGH     | 0.306611108 | 0.016244893 |
| TRIOBP   | 0.306492663 | 0.016288299 |
| CPS1     | 0.306088991 | 0.016436977 |
| TNFAIP6  | 0.305944394 | 0.016490517 |
| NIPAL3   | 0.305768673 | 0.016555781 |
| PLTP     | 0.305724223 | 0.016572325 |
| FLJ42627 | 0.305238035 | 0.016754206 |
| EREG     | 0.305133975 | 0.016793356 |
| MSX2     | 0.304713645 | 0.01695229  |
| IMPG2    | 0.30456653  | 0.01700822  |
| IBA57    | 0.303904707 | 0.017261786 |
| ZNF211   | 0.303746499 | 0.017322876 |

|         |             |             |
|---------|-------------|-------------|
| ITPRID2 | 0.30364492  | 0.017362198 |
| NSUN5P1 | 0.303520909 | 0.017410305 |
| PDE6A   | 0.303437151 | 0.017442862 |
| MFSD11  | 0.303380668 | 0.017464846 |
| MTMR11  | 0.302640336 | 0.017755194 |
| LCAT    | 0.301479195 | 0.018218875 |
| ECE1    | 0.301286859 | 0.018296669 |
| ZNF133  | 0.300315572 | 0.018693869 |

---

Supplementary Table S3. Gene Ontology (GO) terms enriched in genes positively correlated with TG2 expression (r > 0.3).

| GOID       | GO Term                                                          | Term PValue | Term PValue Corrected with Bonferroni step down | Group PValue | Group PValue Corrected with Bonferroni step down | GO Levels           | GO Groups % | Associated Genes No. of Genes | Associated Genes Found |                                                                                                                                                                                                                                                                                                                                                                                                                                                                                                                                                                                                                                                          |
|------------|------------------------------------------------------------------|-------------|-------------------------------------------------|--------------|--------------------------------------------------|---------------------|-------------|-------------------------------|------------------------|----------------------------------------------------------------------------------------------------------------------------------------------------------------------------------------------------------------------------------------------------------------------------------------------------------------------------------------------------------------------------------------------------------------------------------------------------------------------------------------------------------------------------------------------------------------------------------------------------------------------------------------------------------|
| GO:000302  | response to reactive oxygen species                              | 0.00        | 0.03                                            | 0.00         | 0.00                                             | [4]                 | Group00     | 5.96                          | 18.00                  | [CDKN1A, CDKN2A, EDN1, EEF2, HGF, MAPK13, MDM2, MECOM, MET, PAWR, PKD2, PLK3, PSAP, PTPRK, PDXN, PKN, TPST2, TNFAIP3]                                                                                                                                                                                                                                                                                                                                                                                                                                                                                                                                    |
| GO:0008284 | positive regulation of cell proliferation                        | 0.00        | 0.00                                            | 0.00         | 0.00                                             | [2, 3, 4, 5]        | Group01     | 4.39                          | 51.00                  | [ABCC1, ADAMT15, AGAP2, ASAP2, BMP4, CCND1, CD200, CDKN1A, CDKN2A, CRF1, EDN1, EGR3, ELL3, EREG, ETV5, F2R, FGFR1, GATA6, GDF15, HGF, HMG2A, IL12A, ITGA2, ITGB1, LAMB1, LAMC1, LIF, LTBP3, MAB21L2, MAP3K3, MDM2, NES, NR2F2, PKD2, PLAG1, PLOD2, PRKCA, PRKCI, PTHLH, PTX3, RBP1, RNASEH2B, SLC20A1, SOX9, TIAM1, TIMP1, TNFAIP3, TNFSF4, VEGFC, WWTR1]                                                                                                                                                                                                                                                                                                |
| GO:0031589 | cell-substrate adhesion                                          | 0.00        | 0.00                                            | 0.00         | 0.00                                             | [3]                 | Group02     | 5.83                          | 25.00                  | [CASK, CD63, CDKN2A, COL13A1, DUSP3, EFNA5, ITGA2, ITGB1, LAMB1, LAMC1, MAP3K14, MECOM, MICALL2, NCOA3, PTPRK, PTPRO, PDXN, PKN, SDCA, SLC9A1, SPOCK1, TIAM1, TNFRSF12A, TRIBOP, VEGFC]                                                                                                                                                                                                                                                                                                                                                                                                                                                                  |
| GO:0042063 | gliogenesis                                                      | 0.00        | 0.02                                            | 0.00         | 0.00                                             | [5, 6, 7]           | Group03     | 5.75                          | 20.00                  | [CCL2, CDH2, CDK5R1, CDKN1A, EEF2, ETV5, LAMB1, LAMC1, LIF, PLAG1, PRKCI, PTHLH, PTX3, ROR1, SERPINE2, SOX5, TIAM1, TNFRSF21, TSPAN2, ZNF365]                                                                                                                                                                                                                                                                                                                                                                                                                                                                                                            |
| GO:0042493 | response to drug                                                 | 0.00        | 0.00                                            | 0.00         | 0.00                                             | [3]                 | Group04     | 4.08                          | 53.00                  | [ABCA1, ABCA8, ABCC1, AHR, ANKRD1, CCL7, CCND1, CDK5R1, CDKN1A, CDKN2A, CP51, CYP11A2, CYP3A4, DUSP6, EDN1, EEF2, EFNA5, F2R, FZRL1, FGF2, FGFRI, GATA6, GNA13, HGF, HMG2A, ITGA2, LDC1, LOX, MAPK13, MDM2, MECOM, MET, PAK3, PAWR, PPAT, PRAF2, PRNP, PSAP, PTHLH, PTX3, RGS17, RGS2, RGS4, SEMA3C, SLC22A1, SLC25A38, SOX5, SYT1, TPST2, TIAM1, TIMP1, TNFAIP3, TRH, VEGFC]                                                                                                                                                                                                                                                                            |
| GO:2000738 | positive regulation of stem cell differentiation                 | 0.00        | 0.00                                            | 0.00         | 0.00                                             | [4, 5, 6]           | Group05     | 27.27                         | 6.00                   | [BMP4, GATA6, LTBP3, SEMA3C, SOX5, SOX9]                                                                                                                                                                                                                                                                                                                                                                                                                                                                                                                                                                                                                 |
| GO:2000741 | positive regulation of mesenchymal stem cell differentiation     | 0.00        | 0.04                                            | 0.00         | 0.00                                             | [5, 6, 7]           | Group05     | 60.00                         | 3.00                   | [LTBP3, SOX5, SOX9]                                                                                                                                                                                                                                                                                                                                                                                                                                                                                                                                                                                                                                      |
| GO:0045859 | regulation of protein kinase activity                            | 0.00        | 0.00                                            | 0.00         | 0.00                                             | [6, 7, 8, 9]        | Group06     | 4.20                          | 45.00                  | [AGAP2, BDNF, BMP4, CAMK2N1, CARD10, CCND1, CCN1, CDK5R1, CDKN1A, CDKN2A, DEPTOR, DKK1, DUSP2, DUSP3, DUSP6, EDN1, EFNA5, EREG, F2R, FGF2, FGFRI, GADD45A, GDF15, HGF, MAP3K13, MAP3K14, MAP3K3, MAP3K7CL, MECOM, NR2F2, PAK3, PIK3IP1, PKD2, PKIA, PRKCA, PRNP, RGS2, RGS4, SDCA, TIAM1, TIMP1, TNFAIP3, TNFRSF10B, TPST12, WWTR1]                                                                                                                                                                                                                                                                                                                      |
| GO:0045860 | positive regulation of protein kinase activity                   | 0.00        | 0.02                                            | 0.00         | 0.00                                             | [7, 8, 9, 10]       | Group06     | 4.57                          | 32.00                  | [AGAP2, BDNF, BMP4, CARD10, CCND1, CCN1, CDK5R1, CDKN1A, DKK1, DUSP6, EDN1, EFNA5, EREG, F2R, FGF2, FGFRI, GADD45A, GDF15, HGF, MAP3K13, MAP3K14, MAP3K3, MAP3K7CL, MECOM, PAK3, PKD2, PRKCA, PRNP, SDCA, TIAM1, TIMP1, TNFRSF10B]                                                                                                                                                                                                                                                                                                                                                                                                                       |
| GO:0070848 | response to growth factor                                        | 0.00        | 0.02                                            | 0.00         | 0.00                                             | [4]                 | Group07     | 4.24                          | 37.00                  | [ANKRD1, ANOS1, BDNF, BMP4, CASK, CCL2, CD63, CP51, DKK1, DUSP3, DUSP6, DYNCL1L2, EDN1, EEF2, EGR3, FGF2, FGFRI, FNDC4, GALNT3, GATA6, GDF15, HGF, LTBP3, MDM2, MSK2, PKD2, PRDM14, PTPRK, PTX3, PDXN, PKN, RBP1, SKI, SMURF2, SOX5, SOX9, VEGFC]                                                                                                                                                                                                                                                                                                                                                                                                        |
| GO:0007167 | enzyme linked receptor protein signaling pathway                 | 0.00        | 0.00                                            | 0.00         | 0.00                                             | [4, 5, 6]           | Group07     | 4.22                          | 54.00                  | [ACVR1B, AH1, ANOS1, ATP6V0A1, ATP6V0C, ATP6V1A, BDNF, BMP4, CD63, CDK5R1, DKK1, DUSP3, DUSP6, EFEMP1, EFNA5, EREG, FGF2, FGFRI, FST, GALNT3, GATA6, GDF15, GRB14, HGF, IGFBR3, LIF, LTBP3, MET, MSK2, NR2F2, PAK3, PIK3IP1, PKD2, PLAT, PRDM14, PRKCA, PTPRK, PTPRO, PDXN, PKN, RBP1, RBPMS, RHDGF1, ROR1, SH, SLC12A1, SPOCK1, TPST2, SOX9, SYT1, TIAM1, TIPARP, VEGFC, WWTR1]                                                                                                                                                                                                                                                                         |
| GO:0007169 | transmembrane receptor protein tyrosine kinase signaling pathway | 0.00        | 0.00                                            | 0.00         | 0.00                                             | [5, 6, 7]           | Group07     | 4.51                          | 40.00                  | [AH1, ANOS1, ATP6V0A1, ATP6V0C, ATP6V1A, BDNF, CD63, CDK5R1, DUSP3, DUSP6, EFEMP1, EFNA5, EREG, FGF2, FGFRI, GALNT3, GDF15, GRB14, HGF, IGFBR3, MET, NR2F2, PAK3, PIK3IP1, PKD2, PLAT, PRDM14, PRKCA, PTPRK, PTPRO, PDXN, PKN, RBP1, RBPMS, RHDGF1, ROR1, SH, SLC20A1, SOX9, SYT1, TIAM1, TIPARP, VEGFC]                                                                                                                                                                                                                                                                                                                                                 |
| GO:0900068 | positive regulation of cell cycle process                        | 0.00        | 0.03                                            | 0.00         | 0.00                                             | [3, 4, 5, 6]        | Group08     | 5.45                          | 21.00                  | [ADAMT15, CCND1, CDK5R1, CDKN1A, CDKN2A, EDN1, EREG, FGFRI, GADD45A, GATA6, HMG2A, MDM2, MSK2, PKD2, PLAGL1, PLK2, PLK3, PRKCA, RGS4, SVIL, TPST2]                                                                                                                                                                                                                                                                                                                                                                                                                                                                                                       |
| GO:0000082 | G1/S transition of mitotic cell cycle                            | 0.00        | 0.02                                            | 0.00         | 0.00                                             | [5, 6]              | Group08     | 5.94                          | 19.00                  | [ACVR1B, ADAMT15, CCL2, CCND1, CDKN1A, CDKN2A, CH, GADD45A, GF1, ITGB1, JADE1, MDM2, PKD2, PLAGL1, PLK2, PLK3, PPAT, RGS4, TPST2]                                                                                                                                                                                                                                                                                                                                                                                                                                                                                                                        |
| GO:0071156 | regulation of cell cycle arrest                                  | 0.00        | 0.01                                            | 0.00         | 0.00                                             | [4, 5, 6, 7]        | Group08     | 8.23                          | 13.00                  | [CCND1, CDK5R1, CDKN1A, CDKN2A, GADD45A, GATA6, HMG2A, MDM2, PKD2, PLAGL1, PLK2, PLK3, PRKCA]                                                                                                                                                                                                                                                                                                                                                                                                                                                                                                                                                            |
| GO:2000134 | negative regulation of G1/S transition of mitotic cell cycle     | 0.00        | 0.02                                            | 0.00         | 0.00                                             | [6, 7, 8, 9]        | Group08     | 8.51                          | 12.00                  | [CCL2, CCND1, CDKN1A, CDKN2A, CH, GADD45A, JADE1, MDM2, PKD2, PLAGL1, PLK2, PLK3]                                                                                                                                                                                                                                                                                                                                                                                                                                                                                                                                                                        |
| GO:0051093 | negative regulation of developmental process                     | 0.00        | 0.00                                            | 0.00         | 0.00                                             | [2, 3, 4]           | Group09     | 4.30                          | 51.00                  | [ABCA1, ADGRB2, ASAP2, BDNF, BMP4, CAPN3, CARD10, CCND1, CD200, CDK5R1, CDKN2A, DKK1, EFEMP1, EFNA5, EREG, GDF15, GF1, HMG2A, IER3, ITGB1, LOXL2, LRRC17, MAP2, MAP3K14, MAP3K3, MDM2, MSK2, PKD2, PLOD2, PLXNA3, PTHLH, PTPRO, PTX3, RBP1, RGS2, RGS4, SEMA4F, SKI, SOX9, SPOCK1, STARD13, THBS2, TIMP1, TNFRSF21, TNFSF4, TRIM62, VASH1, WW3, WWTR1, ZNF365]                                                                                                                                                                                                                                                                                           |
| GO:0045596 | negative regulation of cell differentiation                      | 0.00        | 0.04                                            | 0.00         | 0.00                                             | [3, 4, 5]           | Group09     | 4.17                          | 37.00                  | [ABCA1, ASAP2, BDNF, BMP4, CAPN3, CCND1, CDK5R1, CDKN2A, DKK1, EFEMP1, EFNA5, EREG, GDF15, GF1, HMG2A, IER3, ITGB1, LRRC17, MAP2, MAP3K14, MDM2, MSK2, PKD2, PLOD2, PLXNA3, PTHLH, PTPRO, PTX3, RBP1, RGS2, RGS4, SEMA4F, SKI, SOX9, SPOCK1, TNFSF4, TRIM62, WWTR1, ZNF365]                                                                                                                                                                                                                                                                                                                                                                              |
| GO:0060284 | regulation of cell development                                   | 0.00        | 0.00                                            | 0.00         | 0.00                                             | [4, 5]              | Group09     | 4.46                          | 50.00                  | [ANKRD1, BDNF, BMP4, CAPRIN2, CDH2, CDK5R1, CDKN1A, CREB3L2, DKK1, EDN1, EFNA5, ELL3, ETV5, FGFRI, G6PD, GF1, HGF, LIF, MAP2, MAP3K13, MAP3K14, MDM2, NCOA3, NRCAM, PAK3, PLAG1, PLK2, PLOD2, PLXNA2, PLXNA3, PRKCI, PTHLH, PTPRO, PTX3, RGS2, RGS4, SEMA3C, SEMA4F, SERPINE2, SKI, SOX9, SPOCK1, SYT1, TIAM1, TIMP1, TNFRSF12A, TNFRSF21, TRIBOP, VEGFC, ZNF365]                                                                                                                                                                                                                                                                                        |
| GO:0045664 | regulation of neuron differentiation                             | 0.00        | 0.05                                            | 0.00         | 0.00                                             | [5, 6, 7, 8, 9]     | Group09     | 4.27                          | 34.00                  | [ANKRD1, BDNF, BMP4, CAPRIN2, CDK5R1, CREB3L2, DKK1, EFNA5, ETV5, FGFRI, GF1, HGF, MAP2, MAP3K13, MAP3K14, MDM2, NCOA3, NRCAM, PAK3, PLK2, PLOD2, PLXNA3, PRKCI, PTPRO, RGS2, SEMA4F, SKI, SOX9, SPOCK1, SYT1, TIAM1, TIMP1, TNFRSF12A, ZNF365]                                                                                                                                                                                                                                                                                                                                                                                                          |
| GO:0048729 | tissue morphogenesis                                             | 0.00        | 0.01                                            | 0.00         | 0.00                                             | [3, 4]              | Group10     | 4.60                          | 34.00                  | [AH1, ALDH1A3, ANKRD1, BMP4, CLIC4, DKK1, EDN1, ETV5, FGF2, FGFRI, HGF, HMG2A, IFT2, ITGA2, ITGB1, LIF, MDM2, MET, MICAL2, MSK2, NR2F2, PKD2, POFUT2, RBP1, ROR1, SDCA, SEMA3C, SMURF2, SOX9, STARD13, STC1, TIAM1, VEGFC]                                                                                                                                                                                                                                                                                                                                                                                                                               |
| GO:0060485 | mesenchyme development                                           | 0.00        | 0.01                                            | 0.00         | 0.00                                             | [4, 5, 6]           | Group10     | 6.12                          | 20.00                  | [BMP4, CD200, CDKN2A, EDN1, ELL3, FGFRI, HGF, HMG2A, LOXL2, MDM2, MSK2, NR2F2, PKD2, POFUT2, RBP1, SEMA3C, SOX9, TIAM1, TRIM62, WWTR1]                                                                                                                                                                                                                                                                                                                                                                                                                                                                                                                   |
| GO:0048762 | mesenchymal cell differentiation                                 | 0.00        | 0.01                                            | 0.00         | 0.00                                             | [4, 5, 6, 7]        | Group10     | 6.80                          | 17.00                  | [BMP4, CDKN2A, EDN1, ELL3, FGFRI, HGF, HMG2A, LOXL2, MSK2, NR2F2, PKD2, POFUT2, RBP1, SEMA3C, SOX9, TIAM1, TRIM62, WWTR1]                                                                                                                                                                                                                                                                                                                                                                                                                                                                                                                                |
| GO:0001837 | epithelial to mesenchymal transition                             | 0.00        | 0.03                                            | 0.00         | 0.00                                             | [5, 6, 7, 8]        | Group10     | 7.74                          | 13.00                  | [BMP4, CDKN2A, ELL3, HGF, HMG2A, LOXL2, MSK2, POFUT2, RBP1, SOX9, TIAM1, TRIM62, WWTR1]                                                                                                                                                                                                                                                                                                                                                                                                                                                                                                                                                                  |
| GO:0035285 | organ growth                                                     | 0.00        | 0.00                                            | 0.00         | 0.00                                             | [2, 3]              | Group11     | 8.21                          | 17.00                  | [CDKN1A, DUSP6, EDN1, EVC, FGF2, FGFRI, G6PD, GATA6, MSK2, PLK1, PSAP, RBP1, RGS2, RGS4, SEMA3C, SERPINE2, SKI, SOX9, SYT1, WW3, WWTR1]                                                                                                                                                                                                                                                                                                                                                                                                                                                                                                                  |
| GO:0061061 | muscle structure development                                     | 0.00        | 0.05                                            | 0.00         | 0.00                                             | [3]                 | Group11     | 4.27                          | 34.00                  | [ANKRD1, BDNF, BMP4, CAPN3, CD200, CDH2, CDKN1A, CH, DKK1, EDN1, EEF2, EGR3, EREG, ETV1, EVC, FGF2, FGFRI, G6PD, GATA6, GDF15, IFT2, IGFBR3, ITGB1, KRT19, LIF, NR2F2, RBP1, RGS2, RGS4, SEC14L2, SLC9A1, SOX9, SYL, WWTR1]                                                                                                                                                                                                                                                                                                                                                                                                                              |
| GO:0048638 | regulation of developmental growth                               | 0.00        | 0.00                                            | 0.00         | 0.00                                             | [3, 4]              | Group11     | 6.91                          | 27.00                  | [BDNF, BMP4, CAPN3, CDK5R1, CDKN1A, DUSP6, EDN1, EFNA5, FGF2, FGFRI, G6PD, GATA6, GDF15, MAP2, MAP3K13, NRCAM, PHLD2A, PLXNA2, PLXNA3, RBP1, RGS2, RGS4, SEMA4F, SLC20A1, SYT1, TNFRSF12A, WW3]                                                                                                                                                                                                                                                                                                                                                                                                                                                          |
| GO:0046620 | regulation of organ growth                                       | 0.00        | 0.02                                            | 0.00         | 0.00                                             | [3, 4, 5]           | Group11     | 9.24                          | 11.00                  | [CDKN1A, DUSP6, EDN1, FGF2, FGFRI, G6PD, GATA6, RBP1, RGS2, RGS4, WW3]                                                                                                                                                                                                                                                                                                                                                                                                                                                                                                                                                                                   |
| GO:0060537 | muscle tissue development                                        | 0.00        | 0.01                                            | 0.00         | 0.00                                             | [4]                 | Group11     | 5.22                          | 26.00                  | [ANKRD1, BMP4, CAPN3, CD200, CDKN1A, DKK1, EDN1, EEF2, FGF2, FGFRI, G6PD, GATA6, IFT2, ITGB1, NR2F2, PKD2, RBP1, RGS2, RGS4, SEC14L2, SEMA3C, SLC9A1, SOX9, SYL, TIPARP, WWTR1]                                                                                                                                                                                                                                                                                                                                                                                                                                                                          |
| GO:0010453 | regulation of cell fate commitment                               | 0.00        | 0.03                                            | 0.00         | 0.00                                             | [4, 5]              | Group11     | 17.65                         | 6.00                   | [BMP4, DKK1, DUSP6, FGF2, FGFRI, RBP1]                                                                                                                                                                                                                                                                                                                                                                                                                                                                                                                                                                                                                   |
| GO:0072359 | circulatory system development                                   | 0.00        | 0.00                                            | 0.00         | 0.00                                             | [4, 5]              | Group11     | 4.56                          | 59.00                  | [ADAMT15, ADAMT156, ADAP2, ADGRB2, AH1, AHR, ANKRD1, BMP4, CARD10, CCL2, CD200, CDH2, CDKN1A, CLIC4, DKK1, DUSP6, ECF1, EDN1, EGR3, EREG, FGF2, FGFRI, G6PD, GATA6, HGF, HMG2A, HSPB6, IFT2, ITGB1, LIF, LOX, LOXL2, MAP3K3, MDM2, MICAL2, MMP19, MSK2, NR2F2, NRCAM, NRXN3, PKD2, PLK2, PRKCA, PTGIS, RBP1, RGS2, RGS4, SEMA3C, SHB, SLC9A1, SOX9, STARD13, THBS2, TIPARP, TNFAIP3, TNFRSF12A, VASH1, VEGFC, WWTR1]                                                                                                                                                                                                                                     |
| GO:0035051 | cardiocyte differentiation                                       | 0.00        | 0.03                                            | 0.00         | 0.00                                             | [4, 5, 6, 7]        | Group11     | 7.14                          | 14.00                  | [BMP4, CDKN1A, DKK1, EDN1, G6PD, GATA6, IFT2, ITGB1, NR2F2, RBP1, RGS2, RGS4, SEMA3C, SLC9A1]                                                                                                                                                                                                                                                                                                                                                                                                                                                                                                                                                            |
| GO:1905207 | regulation of cardiocyte differentiation                         | 0.00        | 0.00                                            | 0.00         | 0.00                                             | [4, 5, 6, 7, 8]     | Group11     | 14.52                         | 9.00                   | [BMP4, DKK1, EDN1, G6PD, GATA6, RBP1, RGS2, RGS4, SEMA3C]                                                                                                                                                                                                                                                                                                                                                                                                                                                                                                                                                                                                |
| GO:2000725 | regulation of cardiac muscle cell differentiation                | 0.00        | 0.02                                            | 0.00         | 0.00                                             | [5, 6, 7, 8, 9, 10] | Group11     | 15.22                         | 7.00                   | [BMP4, DKK1, EDN1, G6PD, RBP1, RGS2, RGS4]                                                                                                                                                                                                                                                                                                                                                                                                                                                                                                                                                                                                               |
| GO:0035265 | organ growth                                                     | 0.00        | 0.00                                            | 0.00         | 0.00                                             | [2, 3]              | Group12     | 8.21                          | 17.00                  | [CDKN1A, DUSP6, EDN1, EVC, FGF2, FGFRI, G6PD, GATA6, MSK2, PLAG1, PSAP, RBP1, RGS2, RGS4, SOX9, STC1, WW3]                                                                                                                                                                                                                                                                                                                                                                                                                                                                                                                                               |
| GO:0040008 | regulation of growth                                             | 0.00        | 0.00                                            | 0.00         | 0.00                                             | [2, 3]              | Group12     | 5.10                          | 45.00                  | [ACVR1B, APBB2, BDNF, BMP4, CAPN3, CAPRIN2, CDK5R1, CDKN1A, CDKN2A, CH, DCBLD2, DUSP6, EDN1, EFNA5, FGF2, FGFRI, G6PD, GATA6, GDF15, HMG2A, IGFBR3, ITPRID2, JADE1, MAP2, MAP3K13, NRCAM, OSBP, PHLD2A, PLXNA2, PLXNA3, RBP1, RGS2, RGS4, SEMA4F, SERPINE2, SERTAD2, SGK1, SLC20A1, SLC9A1, SYT1, TNFRSF12A, TPST12, WW3, ZMATA3]                                                                                                                                                                                                                                                                                                                        |
| GO:0040012 | regulation of locomotion                                         | 0.00        | 0.00                                            | 0.00         | 0.00                                             | [2, 3]              | Group12     | 4.55                          | 54.00                  | [ACVR1B, ADAMT15, BMP4, CARD10, CCL2, CCL7, CD200, CLIC4, CREB3, DDB1, DUSP3, EDN1, EREG, F2R, FZRL1, FGF2, FGFRI, HGF, IGFBR3, IFT2A, ITGA2, LAMB1, MAP3K14, MAP3K3, MDM2, MECOM, MET, NISCH, NR2F2, PAK3, PHLD2A, PKD2, PLK2, PLXNA2, PLXNA3, PRDM14, PRKCA, PTPRK, PTPRO, SDCA, SEMA3C, SERPINE2, SGK1, SMURF2, SOX9, STARD13, STC1, TPST2, TIAM1, TIMP1, TNFAIP6, TRIM62, VASH1, VEGFC]                                                                                                                                                                                                                                                              |
| GO:0048870 | cell motility                                                    | 0.00        | 0.00                                            | 0.00         | 0.00                                             | [2, 3]              | Group12     | 4.06                          | 80.00                  | [ACVR1B, ADAMT15, BMP4, CARD10, CCL2, CCL7, CD200, CLIC4, CREB3, DDB1, DUSP3, EDN1, EREG, F2R, FZRL1, FGF2, FGFRI, HGF, IGFBR3, IFT2A, ITGA2, LAMB1, MAP3K14, MAP3K3, MDM2, MECOM, MET, NISCH, NR2F2, PAK3, PHLD2A, PKD2, PLK2, PLXNA2, PLXNA3, PRDM14, PRKCA, PTPRK, PTPRO, SDCA, SEMA3C, SERPINE2, SGK1, SMURF2, SOX9, STARD13, STC1, TPST2, TIAM1, TIMP1, TNFAIP6, TNFRSF10B, TNFRSF10D, TNFRSF12A, TPEN1, VASH1, VEGFC]                                                                                                                                                                                                                              |
| GO:0009888 | tissue development                                               | 0.00        | 0.00                                            | 0.00         | 0.00                                             | [3]                 | Group12     | 4.23                          | 97.00                  | [ACVR1B, AGAP2, AH1, ALDH1A3, ALP, ANK1, ANKRD1, ASAP2, ATP9C1, BMP4, CAPN3, CCND1, CD200, CDH2, CDKN1A, CDKN2A, CESS, CLIC4, CP51, CREB3L2, CRF1, DKK1, DUSP2, DUSP6, EBF2, EDN1, EEF2, EFEMP1, ELL3, EREG, ETV5, EVC, FZRL1, FGF2, FGFRI, FST, G6PD, GATA6, HGF, HMG2A, HOXB5, IER3, IFT2, ITGB1, KCNM4, KRT19, KRT19.2, LAMB1, LAMC1, LIF, LOXL2, LRRC17, MDM2, MET, MGR, MICAL2, MSK2, NCOA3, NR2F2, PERP, PHLD2A, PKD2, PLOD2, PLXNA2, POFUT2, PSAP, PTGIS, PTHLH, PTPRO, PTX3, RBP1, RGS2, RGS4, ROR1, SDCA, SEC14L2, SEMA3C, SERPINE2, SKI, SLC20A1, SLC9A1, SMURF2, SOX5, SOX9, STARD13, STC1, SVIL, TIAM1, TIMP1, TIPARP, TRIBOP, VEGFC, WWTR1] |
| GO:0040017 | positive regulation of locomotion                                | 0.00        | 0.03                                            | 0.00         | 0.00                                             | [2, 3, 4]           | Group12     | 4.52                          | 31.00                  | [ACVR1B, ADAMT15, BMP4, CCL7, CREB3, DDB1, EDN1, F2R, FZRL1, FGF2, FGFRI, HGF, IL12A, ITGA2, LAMB1, MAP3K14, MAP3K3, MDM2, MECOM, MET, PAK3, PKD2, PLK2, PRDM14, PRKCA, SEMA3C, SMURF2, SOX9, TIAM1, TNFAIP6, VEGFC]                                                                                                                                                                                                                                                                                                                                                                                                                                     |
| GO:0045926 | negative regulation of growth                                    | 0.00        | 0.00                                            | 0.00         | 0.00                                             | [2, 3, 4]           | Group12     | 6.46                          | 21.00                  | [ACVR1B, APBB2, BMP4, CAPRIN2, CDK5R1, CDKN1A, CDKN2A, CH, DCBLD2, G6PD, GDF15, JADE1, MAP2, PLXNA3, RGS2, RGS4, SEMA4F, SERPINE2, SERTAD2, TPST12, WW3]                                                                                                                                                                                                                                                                                                                                                                                                                                                                                                 |
| GO:0048646 | anatomical structure formation involved in morphogenesis         | 0.00        | 0.00                                            | 0.00         | 0.00                                             | [2, 3, 4]           | Group12     | 4.32                          | 57.00                  | [ADAMT15, ADGRB2, AH1, ALDH1A3, ANKRD1, BMP4, CAPN3, CARD10, CCL2, CD200, CDK5R1, CLIC4, DKK1, DUSP2, DUSP6, EDN1, EGR3, EREG, FGF2, FGFRI, GATA6, GDF15, HGF, HMG2A, HSPB6, ITGA2, ITGB1, KRT19, LAMB1, LOXL2, MAP3K3, MMP19, MSK2, NR2F2, NRCAM, NRXN3, PERP, PKD2, PLK2, PLOD2, PLXNA2, POFUT2, PRDM14, PRKCA, PTGIS, RBP1, SDCA, SEMA3C, SHB, SKI, SOX9, STARD13, THBS2, TNFAIP3, TNFRSF12A, VASH1, VEGFC]                                                                                                                                                                                                                                           |
| GO:0051094 | positive regulation of developmental process                     | 0.00        | 0.00                                            | 0.00         | 0.00                                             | [2, 3, 4]           | Group12     | 4.26                          | 71.00                  | [ACVR1B, ADGRB2, AGAP2, AH1, ANKRD1, BDNF, BMP4, CAPN3, CAPRIN2, CCND1, CDH2, CDKN1A, CDKN2A, CREB3L2, DKK1, EDN1, EFNA5, EGR3, ELL3, ETV5, FGF2, FGFRI, FST, GATA6, GDF15, HGF, HMG2A, HSPB6, IGFBR3, IFT2A, ITGB1, ITPRID2, LIF, LOXL2, LTBP3, MAP3K13, MAP3K3, MSK2, NCOA3, NRCAM, PAK3, PAWR, PKD2, PLAG1, PLK2, PRDM14, PRKCA, PRKCI, PTGIS, PTX3, RBP1, RGS2, SEMA3C, SERPINE2, SKI, SLC20A1, SMURF2, SOX5, SOX9, SYT1, THBS2, TIAM1, TIMP1, TNFAIP3, TNFRSF12A, TNFSF4, TRIM62, VEGFC, WWTR1, ZNF365]                                                                                                                                             |
| GO:0006935 | chemotaxis                                                       | 0.00        | 0.00                                            | 0.00         | 0.00                                             | [3, 4]              | Group12     | 4.77                          | 36.00                  | [ABCC1, ACVR1B, APBB2, BDNF, BMP4, CARD10, CCL2, CCL7, CDK5R1, CDKN1A, CLIC4, CREB3, DUSP3, EDN1, EGR3, F2R, FZRL1, FGF2, FGFRI, HGF, IL12A, ITGA2, LAMC1, MECOM, MET, NRCAM, NRXN3, PKD2, PLOD2, PLXNA2, PLXNA3, PRKCA, PTPRO, ROBO3, SEMA3C, SEMA4F, TIAM1, VEGFC]                                                                                                                                                                                                                                                                                                                                                                                     |
| GO:0016477 | cell migration                                                   | 0.00        | 0.00                                            | 0.00         | 0.00                                             | [3, 4]              | Group12     | 4.23                          | 76.00                  | [ACVR1B, ADAMT15, APBB2, BMP4, CARD10, CCL2, CCL7, CD200, CD63, CDH2, CDK5R1, CDKN1A, CLIC4, CREB3, DUSP3, EDN1, EGR3, F2R, FZRL1, FGF2, FGFRI, GRB14, HGF, IGFBR3, IL12A, ITGA2, ITGB1, LAMB1, LAMC1, LOXL2, MAP3K14, MAP3K3, MDM2, MECOM, MET, MSK2, NISCH, NR2F2, NRCAM, PAK3, PHLD2A, PKD2, PLAT, PLK2, PLXNA2, PRKCA, PRKCI, PRSS3, PRSS3P2, PTPRK, PTPRO, PDXN, PKN, RHDGF1, SDCA, SEMA3C, SERPINE2, SGK1, SLC16A4, SLC7A6, SLC9A1, SMURF2, SOX9, SPOCK1, STARD13, STC1, TPST2, TIAM1, TIMP1, TNFAIP6, TNFRSF10B, TNFRSF10D, TNFRSF12A, VASH1, VEGFC]                                                                                              |

|            |                                                       |      |      |      |      |                           |         |      |       |                                                                                                                                                                                                                                                                                                                                                                                                                              |
|------------|-------------------------------------------------------|------|------|------|------|---------------------------|---------|------|-------|------------------------------------------------------------------------------------------------------------------------------------------------------------------------------------------------------------------------------------------------------------------------------------------------------------------------------------------------------------------------------------------------------------------------------|
| GO:0022603 | regulation of anatomical structure morphogenesis      | 0.00 | 0.00 | 0.00 | 0.00 | [3, 4]                    | Group12 | 4.43 | 54.00 | [ADGRB2, AH1, BDNF, BMP4, CAPRIN2, CARD10, CCL2, CCL7, CD200, CDKSR1, DKK1, DUSP6, EDN1, EFNA5, ETV5, FGF2, FGF1, GATA6, GDF15, HGF, HMG2A, HSPB6, ITGB1, LIF, MAP2, MAP3K13, MAP3K3, MYH10, NCOA3, NRCAM, PAK3, PKD2, PLK2, PLXNA2, PLXNA3, PRKCA, PTGIS, PTPRO, RBP1, ROR1, SEMA3C, SEMA4F, SKIL, SMURF2, SOX9, STARD13, SYT1, THBS2, TIAM1, TNFAIP3, TNFRSF12A, TRIOBP, VASH1, VEGFC]                                     |
| GO:0035295 | tube development                                      | 0.00 | 0.00 | 0.00 | 0.00 | [3, 4]                    | Group12 | 4.35 | 54.00 | [ADGRB2, AH1, BMP4, CARD10, CCL2, CD200, CDH2, CDKN1A, CLIC4, CP51, CRLF1, CYP1A2, EDN1, EGR3, EREG, ETV5, FGF2, FGF1, GATA6, HGF, HMG2A, HSPB6, ITGB1, LIF, LOX, LOXL2, MAP3K3, MET, MICAL2, MMP19, MSX2, NR2F2, NRCAM, NRXN3, PKD2, PLK2, PLOD2, PRKCA, PTGIS, RBP1, SDCA, SEMA3C, SERPINE2, SGK1, SMURF2, SOX9, STARD13, THBS2, TIPARP, TNFAIP3, TNFRSF12A, VASH1, VEGFC, WWTR1]                                          |
| GO:0048638 | regulation of developmental growth                    | 0.00 | 0.00 | 0.00 | 0.00 | [3, 4]                    | Group12 | 6.91 | 27.00 | [BDNF, BMP4, CAPN3, CDKSR1, CDKN1A, DUSP6, EDN1, EFNA5, FGF2, FGF1, G6PD, GATA6, GDF15, MAP2, MAP3K13, NRCAM, PHLDA2, PLXNA2, PLXNA3, RBP1, RGS2, RGS4, SEMA4F, SLC0A1, SYT1, TNFRSF12A, WWC3]                                                                                                                                                                                                                               |
| GO:0048729 | tissue morphogenesis                                  | 0.00 | 0.01 | 0.00 | 0.00 | [3, 4]                    | Group12 | 4.60 | 34.00 | [AH1, ALDH1A3, ANKRD1, BMP4, CLIC4, DKK1, EDN1, ETV5, FGF2, FGF1, HGF, HMG2A, IFT20, ITGA2, ITGB1, LIF, MDM2, MET, MICAL2, MSX2, NR2F2, PKD2, PLOD2, POFU2, RBP1, ROR1, SDCA, SEMA3C, SMURF2, SOX9, STARD13, STC1, TIAM1, VEGFC]                                                                                                                                                                                             |
| GO:0051270 | regulation of cellular component movement             | 0.00 | 0.00 | 0.00 | 0.00 | [3, 4]                    | Group12 | 4.47 | 53.00 | [ACVR1B, ADAMT15, BMP4, CARD10, CCL2, CCL7, CD200, CLIC4, CREB3, DUSP3, EDN1, EREG, F2R, F2RL1, FGF2, FGF1, HGF, IGFBR3, IL12A, ITGA2, LAMB1, MAP2, MAP3K14, MAP3K3, MDM2, MECOM, MET, NISCH, NR2F2, PAK3, PHLDA2, PKD2, PLK2, PLXNA2, PRDM14, PRKCA, PTPRK, PTPRO, SDCA, SEMA3C, SERPINE2, SGK1, SMURF2, SOX9, STARD13, STC1, TFPF2, TIAM1, TIMP1, TNFAIP6, VASH1, VEGFC]                                                   |
| GO:0001558 | regulation of cell growth                             | 0.00 | 0.00 | 0.00 | 0.00 | [3, 4, 5]                 | Group12 | 5.75 | 31.00 | [ACVR1B, APB82, BDNF, CAPRIN2, CDKSR1, CDKN1A, CDKN2A, CFH, DCBLD2, EDN1, EFNA5, G6PD, IGFBR3, ITIPRIID2, JADE1, MAP2, MAP3K13, NRCAM, PLXNA2, PLXNA3, RGS2, RGS4, SEMA4F, SERPINE2, SERTAD2, SGK1, SLC9A1, SPOCK1, SYT1, TNFRSF12A, TSPY12]                                                                                                                                                                                 |
| GO:0035239 | tube morphogenesis                                    | 0.00 | 0.00 | 0.00 | 0.00 | [3, 4, 5]                 | Group12 | 4.42 | 45.00 | [ADGRB2, AH1, BMP4, CARD10, CCL2, CD200, CDH2, CLIC4, EDN1, EGR3, EREG, ETV5, FGF2, FGF1, GATA6, HGF, HMG2A, HSPB6, ITGB1, LOX, LOXL2, MAP3K3, MET, MICAL2, MMP19, MSX2, NR2F2, NRCAM, NRXN3, PKD2, PLK2, PLOD2, PRKCA, PTGIS, RBP1, SDCA, SHB, SOX9, STARD13, THBS2, TIPARP, TNFAIP3, TNFRSF12A, VASH1, VEGFC]                                                                                                              |
| GO:0045596 | negative regulation of cell differentiation           | 0.00 | 0.04 | 0.00 | 0.00 | [3, 4, 5]                 | Group12 | 4.17 | 37.00 | [ABCA1, ASAP2, BDNF, BMP4, CAPN3, CND1, CDKSR1, CDKN2A, DKK1, FEEMP1, EFNA5, EREG, G6PD, GF1, ITGB1, LRRRC17, MAP2, MAP3K14, MDM2, MSX2, PLK2, PLOD2, PLXNA3, PTHLH, PTPRO, PTX3, RBP1, RGS2, RGS4, SEMA4F, SKIL, SOX9, SPOCK1, TNFSF4, TRIM62, WWTR1, ZNF365]                                                                                                                                                               |
| GO:0045597 | positive regulation of cell differentiation           | 0.00 | 0.01 | 0.00 | 0.00 | [3, 4, 5]                 | Group12 | 4.00 | 48.00 | [ACVR1B, AH1, ANKRD1, BDNF, BMP4, CAPRIN2, CDH2, CREB3L2, DKK1, EDN1, EFNA5, EGR3, ELL3, ETV5, FGF2, FGF1, GATA6, GDF15, HGF, IGFBR3, IL12A, LIF, LOXL2, LTFP3, MAP3K13, MSX2, NCOA3, NRCAM, PAK3, PLAG1, PRKCA, PRKCI, RBP1, RGS2, SEMA3C, SERPINE2, SKIL, SOX9, SYT1, TIAM1, TIMP1, TNFRSF12A, TNFRSF21, VEGFC, WWTR1, ZNF365]                                                                                             |
| GO:0046620 | regulation of organ growth                            | 0.00 | 0.02 | 0.00 | 0.00 | [3, 4, 5]                 | Group12 | 9.24 | 11.00 | [CDKN1A, DUSP6, EDN1, FGF2, FGF1, G6PD, GATA6, RBP1, RGS2, RGS4, WWC3]                                                                                                                                                                                                                                                                                                                                                       |
| GO:0048588 | developmental cell growth                             | 0.00 | 0.00 | 0.00 | 0.00 | [3, 4, 5]                 | Group12 | 7.14 | 20.00 | [BDNF, CDKSR1, EDN1, EFNA5, G6PD, ITGB1, LAMC1, MAP2, MAP3K13, NRCAM, PLOD2, PLXNA2, PLXNA3, RGS2, RGS4, SEMA4F, SOX9, SYT1, TIAM1, TNFRSF12A]                                                                                                                                                                                                                                                                               |
| GO:0050920 | regulation of chemotaxis                              | 0.00 | 0.00 | 0.00 | 0.00 | [3, 4, 5]                 | Group12 | 7.06 | 18.00 | [CCL2, CCL7, CREB3, DUSP3, EDN1, F2RL1, FGF2, FGF1, IL12A, ITGA2, MECOM, MET, PKD2, PLXNA2, PLXNA3, PTPRO, TIAM1, VEGFC]                                                                                                                                                                                                                                                                                                     |
| GO:0051272 | positive regulation of cellular component movement    | 0.00 | 0.00 | 0.02 | 0.00 | [3, 4, 5]                 | Group12 | 4.67 | 31.00 | [ACVR1B, ADAMT15, BMP4, CCL7, CREB3, EDN1, F2R, F2RL1, FGF2, FGF1, HGF, IL12A, ITGA2, LAMB1, MAP2, MAP3K14, MAP3K3, MDM2, MECOM, MET, PAK3, PKD2, PLK2, PRDM14, PRKCA, SEMA3C, SMURF2, SOX9, TIAM1, TNFAIP6, VEGFC]                                                                                                                                                                                                          |
| GO:0060429 | epithelium development                                | 0.00 | 0.00 | 0.00 | 0.00 | [4]                       | Group12 | 4.09 | 60.00 | [ACVR1B, ADAP2, AH1, ALDH1A3, ASAP2, BMP4, CND1, CD200, CDH2, CDKN1A, CE52, CLIC4, CP51, CRLF1, DKK1, EDN1, EREG, ETV5, F2RL1, FGF2, FGF1, FST, GATA6, HGF, HXB5, IFT20, ITGA2, KRIT1, KRIT19, KRIT23, LAMC1, LIF, LOXL2, MET, MICAL2, NCOA3, NR2F2, PERP, PKD2, PLOD2, PLXNA2, PSAP, PTPRO, PTX3, RBP1, ROR1, SDCA, SEC14L2, SEMA3C, SERPINE2, SKIL, SMURF2, SOX9, STARD13, STC1, TIAM1, TRIOBP, VEGFC, WWTR1]              |
| GO:0060537 | muscle tissue development                             | 0.00 | 0.01 | 0.00 | 0.00 | [4]                       | Group12 | 5.22 | 26.00 | [ANKRD1, BMP4, CAPN3, CD200, CDKN1A, DKK1, EDN1, EEF2, FGF2, FGF1, G6PD, GATA6, IFT20, ITGB1, NR2F2, PKD2, PRKCA, RGS4, SEC14L2, SEMA3C, SLC9A1, SOX9, SVIL, TIPARP, WWTR1]                                                                                                                                                                                                                                                  |
| GO:2000145 | regulation of cell motility                           | 0.00 | 0.00 | 0.00 | 0.00 | [3, 4, 5]                 | Group12 | 4.64 | 51.00 | [ACVR1B, ADAMT15, BMP4, CARD10, CCL2, CCL7, CD200, CLIC4, CREB3, DUSP3, EDN1, EREG, F2R, F2RL1, FGF2, FGF1, HGF, IGFBR3, IL12A, ITGA2, LAMB1, MAP3K14, MAP3K3, MDM2, MECOM, MET, NISCH, NR2F2, PAK3, PHLDA2, PKD2, PLK2, PLXNA2, PRDM14, PRKCA, PTPRK, PTPRO, SDCA, SEMA3C, SERPINE2, SGK1, SMURF2, SOX9, STARD13, STC1, TFPF2, TIAM1, TIMP1, TNFAIP6, VASH1, VEGFC]                                                         |
| GO:0001667 | ameboid-type cell migration                           | 0.00 | 0.00 | 0.00 | 0.00 | [4, 5]                    | Group12 | 6.54 | 32.00 | [ACVR1B, BMP4, CARD10, CD200, EDN1, EGR3, FGF2, FGF1, ITGA2, ITGB1, LOXL2, MAP3K14, MAP3K3, MET, NR2F2, PAK3, PKD2, PLK2, PRKCA, PRSS3, PRSS3P2, PXDN, PKN, SDCA, SEMA3C, SMURF2, SOX9, STARD13, STC1, TIMP1, VASH1, VEGFC]                                                                                                                                                                                                  |
| GO:0008361 | regulation of cell size                               | 0.00 | 0.04 | 0.00 | 0.00 | [4, 5]                    | Group12 | 7.07 | 14.00 | [BDNF, CDKSR1, DEPTOR, EDN1, EFNA5, KCNNA, LARS, MAP2, MAP3K13, NRCAM, PLXNA2, PLXNA3, SEMA4F, TNFRSF12A]                                                                                                                                                                                                                                                                                                                    |
| GO:0009887 | animal organ morphogenesis                            | 0.00 | 0.01 | 0.00 | 0.00 | [3, 4, 5, 6]              | Group12 | 4.04 | 47.00 | [ADAMT15, AH1, ALDH1A3, ALPL, ANKRD1, BMP4, CCL2, CDH2, CFH, COL13A1, DKK1, EDN1, FEEMP1, EREG, ETV5, FGF2, FGF1, GATA6, HGF, HXB5, ITGA2, LAMB1, LIF, MDM2, MGP, MICAL2, MSX2, NR2F2, PERP, PHLDA2, PKD2, PLAG1, PRKCI, PTX3, RBP1, ROR1, SEMA3C, SFTPB, SMURF2, SOX9, STC1, TIAM1, TIPARP, TNFAIP3, TRIOBP, VEGFC, WWTR1]                                                                                                  |
| GO:0030308 | negative regulation of cell growth                    | 0.00 | 0.00 | 0.00 | 0.00 | [3, 4, 5, 6]              | Group12 | 7.86 | 18.00 | [ACVR1B, APB82, CAPRIN2, CDKSR1, CDKN1A, CDKN2A, CFH, DCBLD2, G6PD, JADE1, MAP2, PLXNA3, RGS2, RGS4, SEMA4F, SERPINE2, SERTAD2, TSPY12]                                                                                                                                                                                                                                                                                      |
| GO:0060284 | regulation of cell development                        | 0.00 | 0.00 | 0.00 | 0.00 | [4, 5]                    | Group12 | 4.46 | 50.00 | [ANKRD1, BDNF, BMP4, CAPRIN2, CDH2, CDKSR1, CDKN1A, CREB3L2, DKK1, EDN1, EFNA5, ELL3, ETV5, FGF1, G6PD, GF1, HGF, LIF, MAP2, MAP3K13, MAP3K14, MDM2, NCOA3, NRCAM, PAK3, PLAG1, PLK2, PLOD2, PLXNA2, PLXNA3, PRKCI, PTHLH, PTPRO, PTX3, RGS2, RGS4, SEMA3C, SEMA4F, SERPINE2, SKIL, SOX9, SPOCK1, SYT1, TIAM1, TIMP1, TNFRSF12A, TNFRSF21, TRIOBP, VEGFC, ZNF365]                                                            |
| GO:0072359 | circulatory system development                        | 0.00 | 0.00 | 0.00 | 0.00 | [4, 5]                    | Group12 | 4.56 | 59.00 | [ADAMT15, ADAMTS5, ADAP2, ADGRB2, AH1, AHR, ANKRD1, BMP4, CARD10, CCL2, CD200, CDH2, CDKN1A, CLIC4, DUSP6, ECE1, EDN1, EGF, EREG, FGF2, FGF1, G6PD, GATA6, HGF, HMG2A, HSPB6, IFT20, ITGB1, LIF, LOX, LOXL2, MAP3K3, MDM2, MICAL2, MMP19, MSX2, NR2F2, NRCAM, NRXN3, PKD2, PLK2, PRKCA, PTGIS, RBP1, RGS2, RGS4, SEMA3C, SHB, SLC9A1, SOX9, STARD13, THBS2, TIPARP, TNFAIP3, TNFRSF12A, VASH1, VEGFC, WWTR1]                 |
| GO:0000904 | cell morphogenesis involved in differentiation        | 0.00 | 0.02 | 0.00 | 0.00 | [4, 5, 6]                 | Group12 | 4.30 | 37.00 | [ANK3, ANOS1, APB82, BDNF, CAPRIN2, CDKSR1, CLIC4, DKK1, EFNA5, ETV1, IER3, ITGB1, LAMB1, LAMC1, MAP2, MAP3K13, MET, MICALL2, NCOA3, NRCAM, NRXN3, PAK3, PLOD2, PLXNA2, PLXNA3, PRKCA, PTPRO, ROBO3, SEC14L2, SEMA3C, SEMA4F, SKIL, STC1, TIAM1, TNFRSF12A, TRIOBP, ZNF365]                                                                                                                                                  |
| GO:0010631 | epithelial cell migration                             | 0.00 | 0.00 | 0.00 | 0.00 | [4, 5, 6]                 | Group12 | 6.95 | 26.00 | [BMP4, CARD10, CD200, EDN1, EGR3, FGF2, FGF1, ITGA2, ITGB1, LOXL2, MAP3K14, MAP3K3, MET, NR2F2, PKD2, PLK2, PRKCA, PRSS3, PRSS3P2, PXDN, PKN, SOX9, STARD13, STC1, VASH1, VEGFC]                                                                                                                                                                                                                                             |
| GO:0010632 | regulation of epithelial cell migration               | 0.00 | 0.01 | 0.00 | 0.00 | [3, 4, 5, 6, 7]           | Group12 | 6.64 | 19.00 | [BMP4, CARD10, CD200, EDN1, FGF2, FGF1, ITGA2, MAP3K14, MAP3K3, MET, NR2F2, PKD2, PLK2, PRKCA, SOX9, STARD13, STC1, VASH1, VEGFC]                                                                                                                                                                                                                                                                                            |
| GO:0030334 | regulation of cell migration                          | 0.00 | 0.00 | 0.00 | 0.00 | [4, 5, 6]                 | Group12 | 4.73 | 49.00 | [ACVR1B, ADAMT15, BMP4, CARD10, CCL2, CCL7, CD200, CLIC4, CREB3, DUSP3, EDN1, F2R, F2RL1, FGF2, FGF1, HGF, IGFBR3, IL12A, ITGA2, LAMB1, MAP3K14, MAP3K3, MDM2, MECOM, MET, NISCH, NR2F2, PAK3, PHLDA2, PKD2, PLK2, PLXNA2, PRKCA, PTPRK, PTPRO, SDCA, SEMA3C, SERPINE2, SGK1, SMURF2, SOX9, STARD13, STC1, TFPF2, TIAM1, TIMP1, TNFAIP6, VASH1, VEGFC]                                                                       |
| GO:0051960 | regulation of nervous system development              | 0.00 | 0.00 | 0.00 | 0.00 | [4, 5, 6]                 | Group12 | 4.32 | 47.00 | [ADGRB2, ANKRD1, BDNF, BMP4, CAPRIN2, CDH2, CDKSR1, CDKN1A, CREB3L2, DKK1, EFNA5, ELL3, ETV5, FGF1, GF1, HGF, ITIPRIID2, LIF, MAP2, MAP3K13, MAP3K14, MDM2, NCOA3, NRCAM, PAK3, PLAG1, PLK2, PLOD2, PLXNA2, PLXNA3, PRKCI, PTPRO, PTX3, RGS2, SEMA4F, SERPINE2, SKIL, SOX9, SPOCK1, SYT1, THBS2, TIAM1, TIMP1, TNFRSF12A, TNFRSF21, VEGFC, ZNF365]                                                                           |
| GO:0060485 | mesenchyme development                                | 0.00 | 0.01 | 0.00 | 0.00 | [4, 5, 6]                 | Group12 | 6.12 | 20.00 | [BMP4, CD200, CDKN2A, EDN1, ELL3, FGF1, HGF, HMG2A, LOXL2, MDM2, MSX2, NR2F2, PKD2, POFU2, RBP1, SEMA3C, SOX9, TIAM1, TRIM62, WWTR1]                                                                                                                                                                                                                                                                                         |
| GO:0001944 | vasculature development                               | 0.00 | 0.00 | 0.00 | 0.00 | [4, 5, 6, 7]              | Group12 | 4.92 | 42.00 | [ADAMTS5, ADGRB2, AHR, BMP4, CARD10, CCL2, CD200, CDH2, CLIC4, EDN1, EGR3, EREG, FGF2, FGF1, GATA6, HGF, HMG2A, HSPB6, ITGB1, LIF, LOX, LOXL2, MAP3K3, MDM2, MMP19, NR2F2, NRCAM, NRXN3, PKD2, PLK2, PRKCA, PTGIS, RBP1, SEMA3C, SHB, STARD13, THBS2, TIPARP, TNFAIP3, TNFRSF12A, VASH1, VEGFC]                                                                                                                              |
| GO:0048762 | mesenchymal cell differentiation                      | 0.00 | 0.01 | 0.00 | 0.00 | [4, 5, 6, 7]              | Group12 | 6.80 | 17.00 | [BMP4, CDKN2A, EDN1, ELL3, FGF1, HGF, HMG2A, LOXL2, MSX2, NR2F2, POFU2, RBP1, SEMA3C, SOX9, TIAM1, TRIM62, WWTR1]                                                                                                                                                                                                                                                                                                            |
| GO:0010594 | regulation of endothelial cell migration              | 0.00 | 0.01 | 0.00 | 0.00 | [4, 5, 6, 7, 8]           | Group12 | 7.58 | 16.00 | [BMP4, CARD10, CD200, EDN1, FGF2, FGF1, MAP3K3, MET, NR2F2, PKD2, PLK2, PRKCA, STARD13, STC1, VASH1, VEGFC]                                                                                                                                                                                                                                                                                                                  |
| GO:0043542 | endothelial cell migration                            | 0.00 | 0.00 | 0.00 | 0.00 | [5, 6, 7]                 | Group12 | 8.46 | 23.00 | [BMP4, CARD10, CD200, EDN1, EGR3, FGF2, FGF1, ITGB1, LOXL2, MAP3K3, MET, NR2F2, PKD2, PLK2, PRKCA, PRSS3, PRSS3P2, PXDN, PKN, STARD13, STC1, VASH1, VEGFC]                                                                                                                                                                                                                                                                   |
| GO:0048666 | neuron development                                    | 0.00 | 0.00 | 0.00 | 0.00 | [4, 5, 7, 8, 9]           | Group12 | 4.21 | 56.00 | [AH1, ANK3, ANKRD1, ANOS1, APB82, BDNF, CAPRIN2, CDKSR1, CDKN1A, CREB3L2, DKK1, EFNA5, ELL3, ETV5, FGF1, GF1, HGF, IER3, IFT20, ITGB1, LAMB1, LAMC1, LIF, MAP2, MAP3K13, MAP3K14, MDM2, MICALL2, NCOA3, NPAS2, NRCAM, NRXN3, PAK3, PLK2, PLOD2, PLXNA2, PLXNA3, PRKCA, PRKCI, PSAP, PTHLH, PTPRK, PTPRO, PTX3, RGS2, ROBO3, SDCA, SEMA3C, SEMA4F, SGK1, SKIL, SPOCK1, SYT1, TIAM1, TIMP1, TNFRSF12A, TRIOBP, TSPAN2, ZNF365] |
| GO:0001525 | angiogenesis                                          | 0.00 | 0.00 | 0.00 | 0.00 | [3, 4, 5, 6, 7, 8, 9, 10] | Group12 | 5.42 | 34.00 | [ADGRB2, BMP4, CARD10, CCL2, CD200, CLIC4, EDN1, EGR3, EREG, FGF2, FGF1, GATA6, HGF, HMG2A, HSPB6, ITGB1, LOXL2, MAP3K3, MMP19, NR2F2, NRCAM, NRXN3, PKD2, PLK2, PRKCA, PTGIS, RBP1, SHB, STARD13, THBS2, TNFAIP3, TNFRSF12A, VASH1, VEGFC]                                                                                                                                                                                  |
| GO:0048514 | blood vessel morphogenesis                            | 0.00 | 0.00 | 0.00 | 0.00 | [4, 5, 6, 7, 8, 9]        | Group12 | 5.08 | 37.00 | [ADGRB2, BMP4, CARD10, CCL2, CD200, CDH2, CLIC4, EDN1, EGR3, EREG, FGF2, FGF1, GATA6, HGF, HMG2A, HSPB6, ITGB1, LOX, LOXL2, MAP3K3, MMP19, NR2F2, NRCAM, NRXN3, PKD2, PLK2, PRKCA, PTGIS, RBP1, SHB, STARD13, THBS2, TIPARP, TNFAIP3, TNFRSF12A, VASH1, VEGFC]                                                                                                                                                               |
| GO:0050767 | regulation of neurogenesis                            | 0.00 | 0.00 | 0.00 | 0.00 | [4, 5, 6, 7, 8]           | Group12 | 4.52 | 44.00 | [ANKRD1, BDNF, BMP4, CAPRIN2, CDH2, CDKSR1, CDKN1A, CREB3L2, DKK1, EFNA5, ELL3, ETV5, FGF1, GF1, HGF, LIF, MAP2, MAP3K13, MAP3K14, MDM2, NCOA3, NRCAM, PAK3, PLAG1, PLK2, PLOD2, PLXNA2, PLXNA3, PRKCI, PTPRO, PTX3, RGS2, SEMA4F, SERPINE2, SKIL, SOX9, SPOCK1, SYT1, TIAM1, TIMP1, TNFRSF12A, TNFRSF21, VEGFC, ZNF365]                                                                                                     |
| GO:0043534 | blood vessel endothelial cell migration               | 0.00 | 0.01 | 0.00 | 0.00 | [6, 7, 8]                 | Group12 | 8.67 | 13.00 | [CARD10, CD200, EGR3, FGF2, FGF1, ITGB1, MAP3K3, PKD2, PLK2, PRKCA, STARD13, VASH1, VEGFC]                                                                                                                                                                                                                                                                                                                                   |
| GO:0043535 | regulation of blood vessel endothelial cell migration | 0.00 | 0.03 | 0.00 | 0.00 | [5, 6, 7, 8, 9]           | Group12 | 8.94 | 11.00 | [CARD10, CD200, FGF2, FGF1, MAP3K3, PKD2, PLK2, PRKCA, STARD13, VASH1, VEGFC]                                                                                                                                                                                                                                                                                                                                                |
| GO:0045664 | regulation of neuron differentiation                  | 0.00 | 0.05 | 0.00 | 0.00 | [5, 6, 7, 8, 9]           | Group12 | 4.27 | 34.00 | [ANKRD1, BDNF, BMP4, CAPRIN2, CDKSR1, CREB3L2, DKK1, EFNA5, ETV5, FGF1, GF1, HGF, MAP2, MAP3K13, MAP3K14, MDM2, NCOA3, NRCAM, PAK3, PLK2, PLXNA2, PLXNA3, PRKCI, PTPRO, RGS2, SEMA4F, SKIL, SOX9, SPOCK1, SYT1, TIAM1, TIMP1, TNFRSF12A, ZNF365]                                                                                                                                                                             |
| GO:0031175 | neuron projection development                         | 0.00 | 0.00 | 0.00 | 0.00 | [5, 6, 8, 9, 10]          | Group12 | 4.42 | 52.00 | [ANK3, ANKRD1, ANOS1, APB82, BDNF, CAPRIN2, CDKSR1, CREB3L2, EFNA5, ETV1, FGF1, GF1, HGF, IER3, IFT20, ITGB1, LAMB1, LAMC1, MAP2, MAP3K13, MAP3K14, MDM2, MICALL2, NCOA3, NPAS2, NRCAM, NRXN3, PAK3, PLK2, PLOD2, PLXNA2, PLXNA3, PRKCA, PRKCI, PTHLH, PTPRK, PTPRO, RGS2, ROBO3, SDCA, SEMA3C, SEMA4F, SGK1, SKIL, SPOCK1, SYT1, TIAM1, TIMP1, TNFRSF12A, TRIOBP, TSPAN2, ZNF365]                                           |
| GO:0010975 | regulation of neuron projection development           | 0.00 | 0.01 | 0.00 | 0.00 | [6, 7, 8, 9, 10, 11]      | Group12 | 4.85 | 29.00 | [ANKRD1, BDNF, CAPRIN2, CDKSR1, CREB3L2, EFNA5, FGF1, GF1, HGF, MAP2, MAP3K13, MAP3K14, MDM2, NRCAM, PAK3, PLK2, PLXNA2, PLXNA3, PRKCI, PTPRO, RGS2, SEMA4F, SKIL, SPOCK1, SYT1, TIAM1, TIMP1, TNFRSF12A, ZNF365]                                                                                                                                                                                                            |
